# Supplementary material
Source: publisher figshare collection journal article supplement (https://tandf.figshare.com/ndownloader/files/14617130)
Supplement: Supplementary file 1 [file 14617130]

## SUPPLEMENTARY MATERIAL

### Phytochemical investigation of the needles of *Abies nebrodensis* (Lojac.) Mattei

Rosario Schicchi,<sup>a</sup> Anna Geraci,<sup>b</sup> Sergio Rosselli,<sup>\*a</sup> Alberto Spinella,<sup>c</sup> Antonella Maggio,<sup>b</sup> and Maurizio Bruno<sup>b</sup>

<sup>a</sup> *Department of Agricultural and Forest Sciences (SAF), University of Palermo, Viale delle Scienze, Parco d'Orleans II, IT-90128 Palermo, Italy*

<sup>b</sup> *Department of Biological, Chemical and Pharmaceutical Sciences and Technologies (STEBICEF), University of Palermo, Italy*

<sup>c</sup> *Advanced Technologies Network Center, Viale delle Scienze, I-90128 Palermo, Italy*

*Abies nebrodensis* (Lojac.) Mattei (Pinaceae) is a species living in a very small population only in a confined area of Sicily. In this study the dichloromethane extract of the leaves was analyzed. Apart from three already known metabolites namely dehydroabietic acid; maltol; and rheosmin, previously detected in other species of *Abies*, a lanostane derivative was isolated. Its chemical structure was elucidated by means of extensive spectroscopic methods.

**Keywords:** *Abies nebrodensis*; Lanostane; Dehydroabietic acid; Maltol; Rheosmin

## Content

- Figure S1.** Structure and selected ROESY correlations for **1**
- Figure S2.** IR spectrum of compound **1**
- Figure S3.** HR-Mass spectrum of compound **1**
- Figure S4.**  $^1\text{H}$  NMR spectrum of **1** recorded in  $\text{CDCl}_3$  at 400 MHz
- Figure S5.**  $^{13}\text{C}$  NMR spectrum of **1** recorded in  $\text{CDCl}_3$  at 100 MHz
- Figure S6.** DEPT spectrum of **1** recorded in  $\text{CDCl}_3$
- Figure S7.** HSQC spectrum of **1** recorded in  $\text{CDCl}_3$
- Figure S8.** HMBC spectrum of **1** recorded in  $\text{CDCl}_3$
- Figure S9.** HSQC-TOCSY spectrum of **1** recorded in  $\text{CDCl}_3$
- Figure S10.** ROESY spectrum of **1** recorded in  $\text{CDCl}_3$

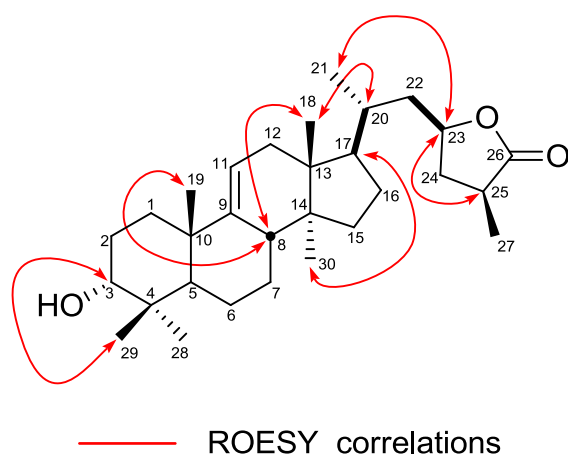

**Figure S1.** Structure and selected ROESY correlations for **1**

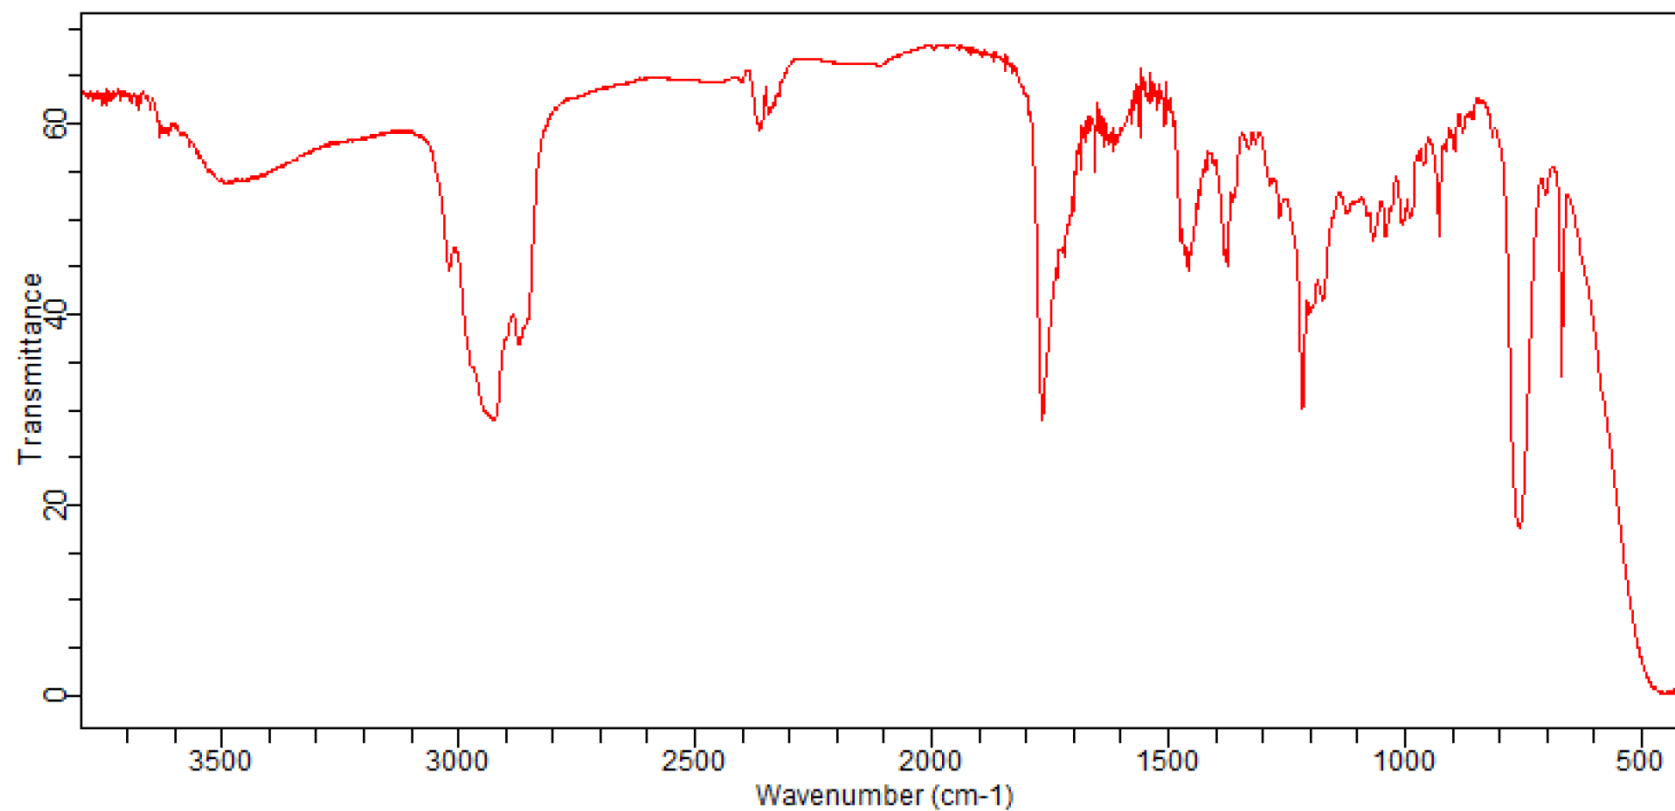

**Figure S2.** IR spectrum of compound **1**

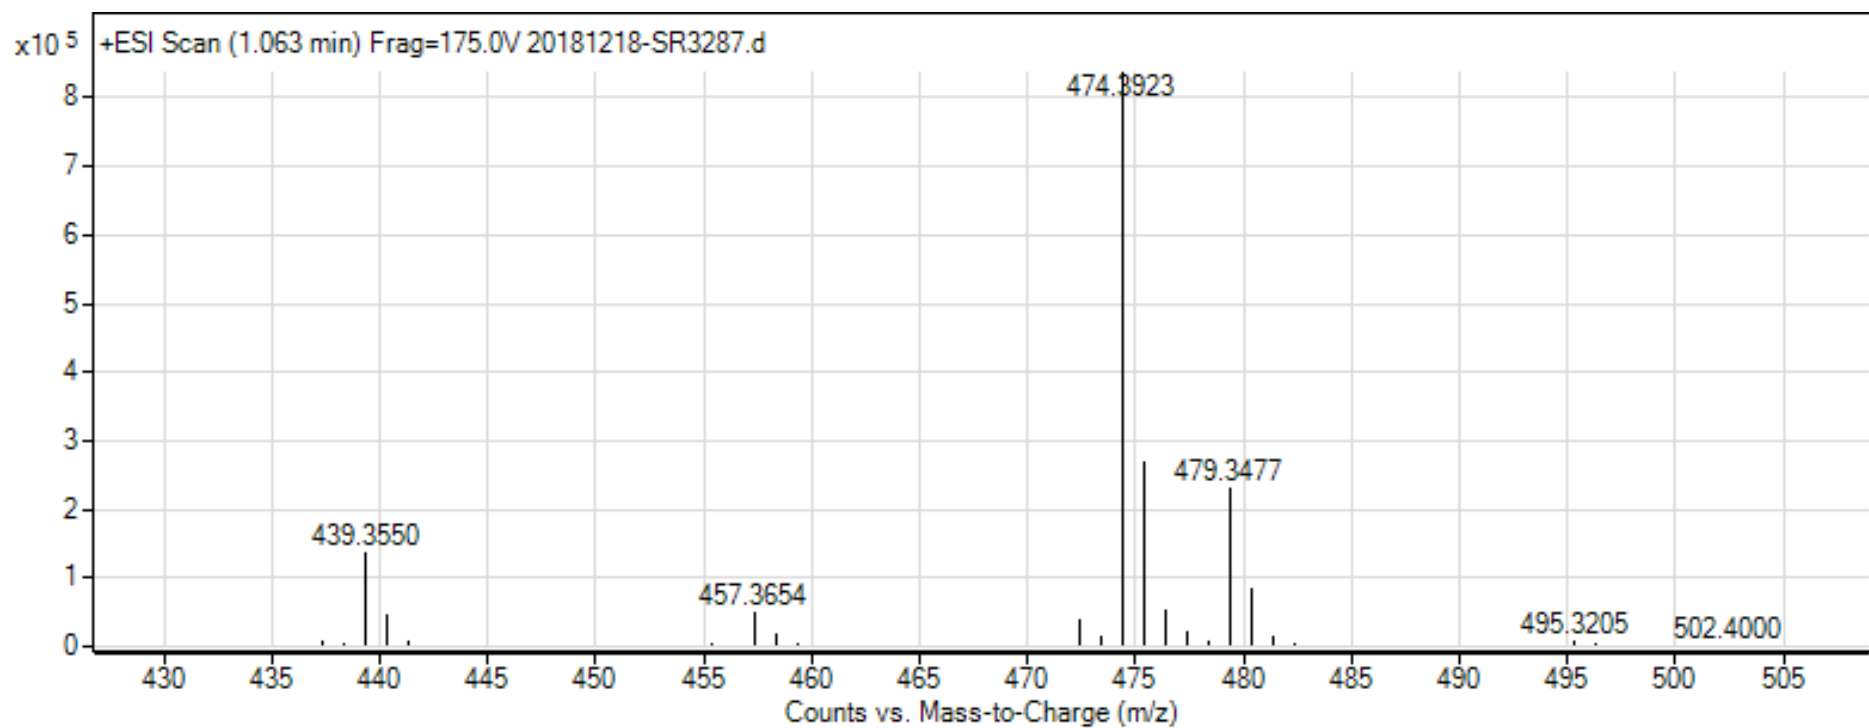

**Figure S3.** HR-Mass spectrum of compound **1**

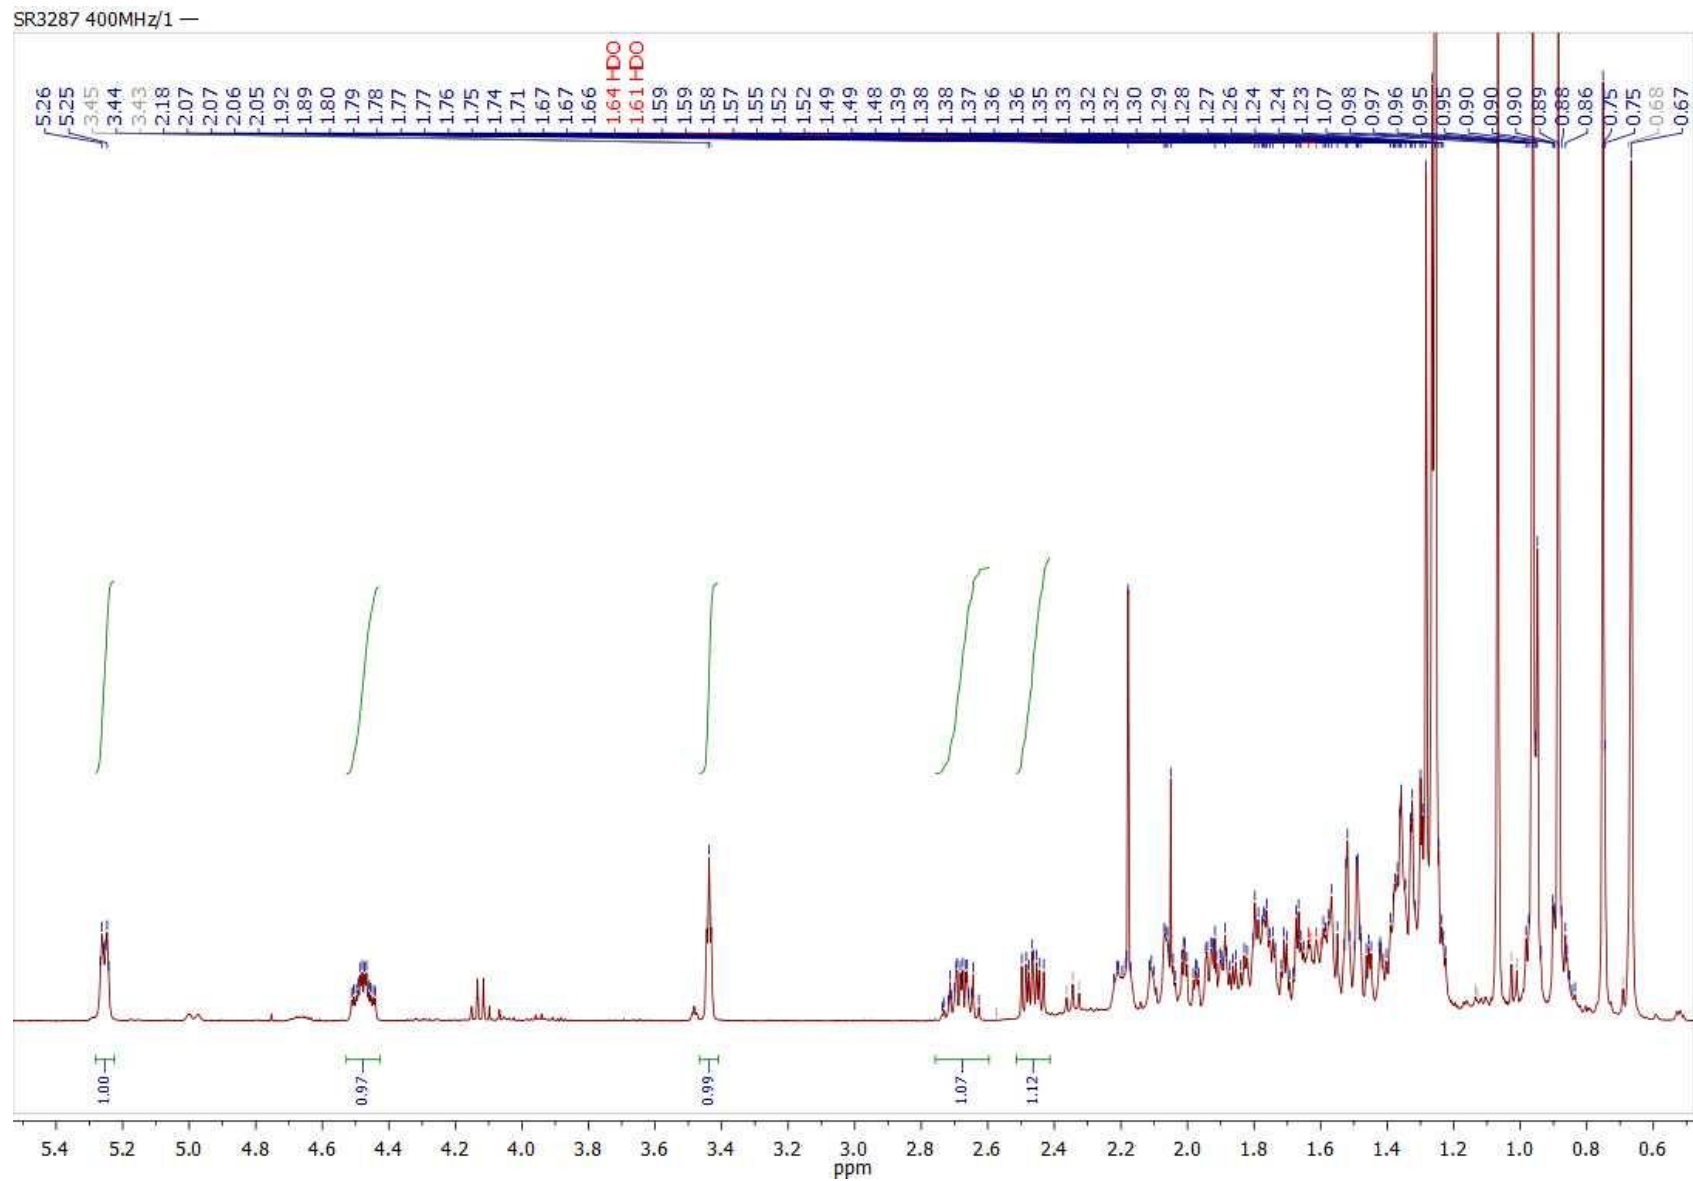

**Figure S4.**  $^1\text{H}$  NMR spectrum of **1** recorded in  $\text{CDCl}_3$  at 400 MHz

SR3287 400MHz/2 — carbonio disaccoppiato

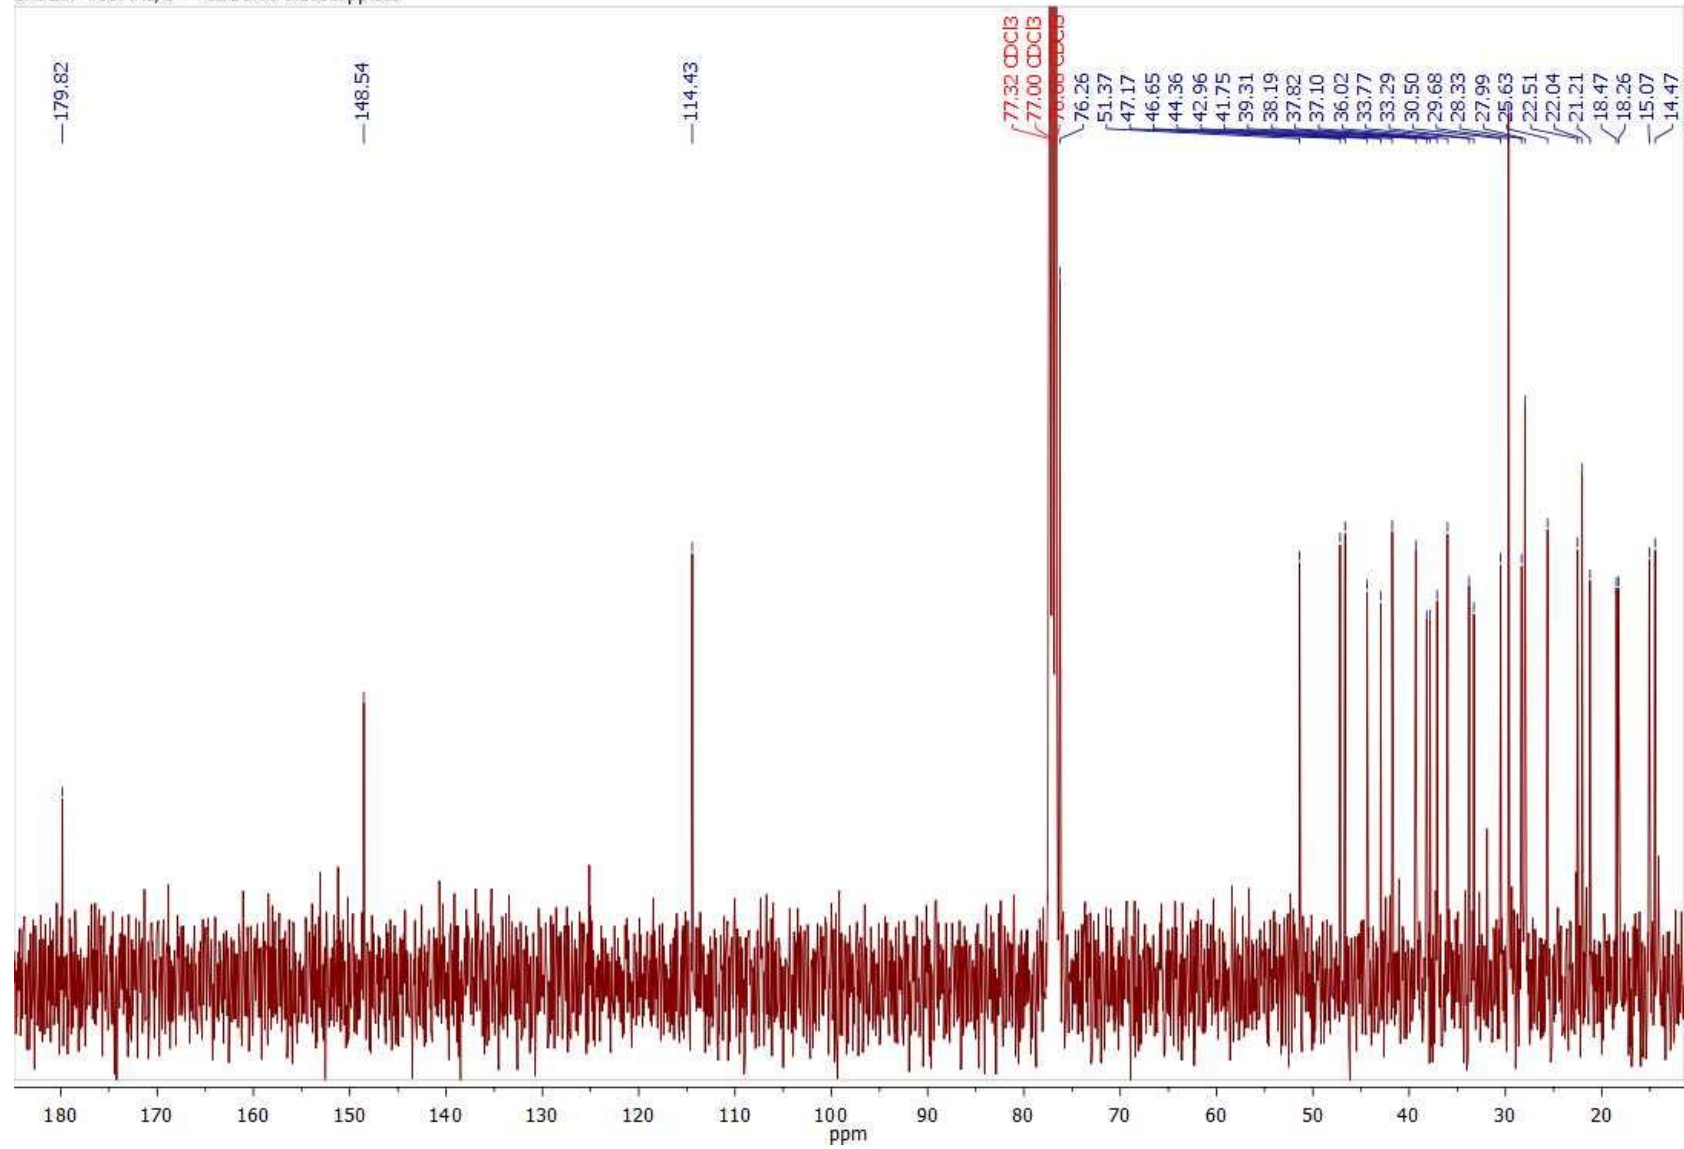

Figure S5.  $^{13}\text{C}$  NMR spectrum of **1** recorded in  $\text{CDCl}_3$  at 100 MHz

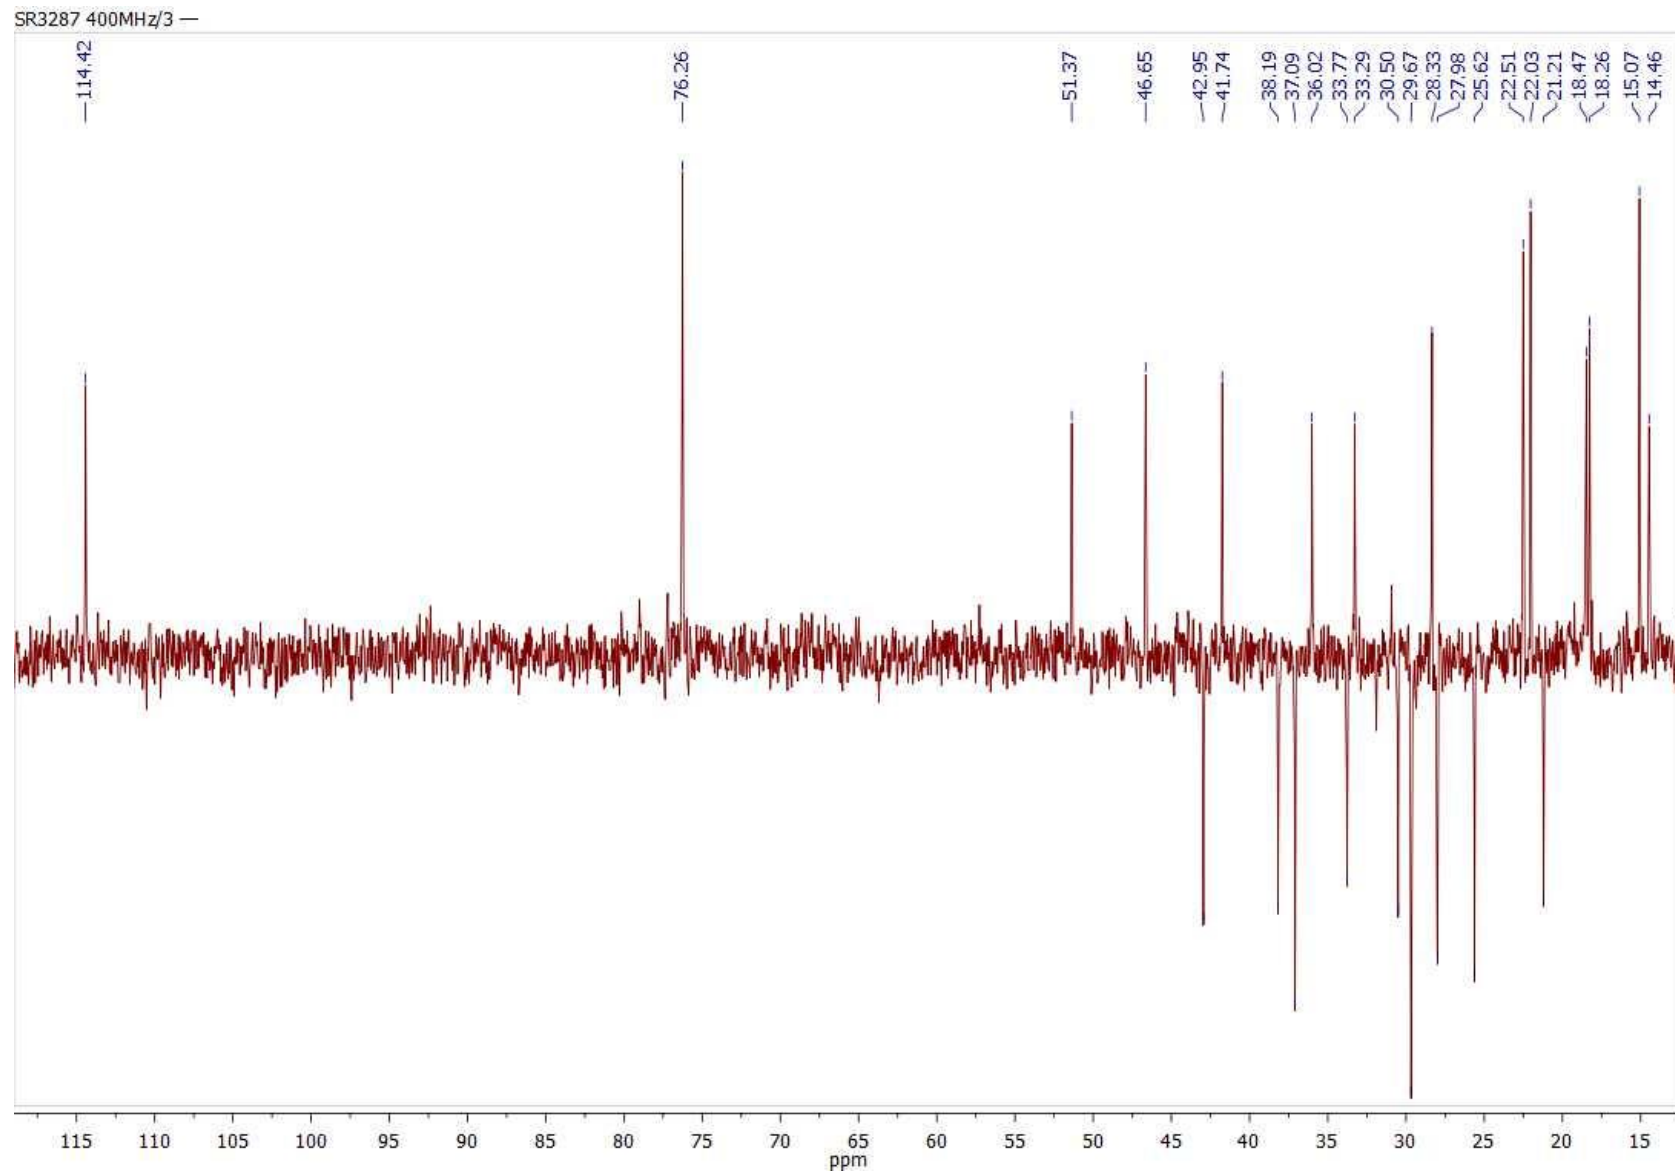

**Figure S6.** DEPT spectrum of **1** recorded in  $\text{CDCl}_3$



SR3287 400MHz/4 — HSQC

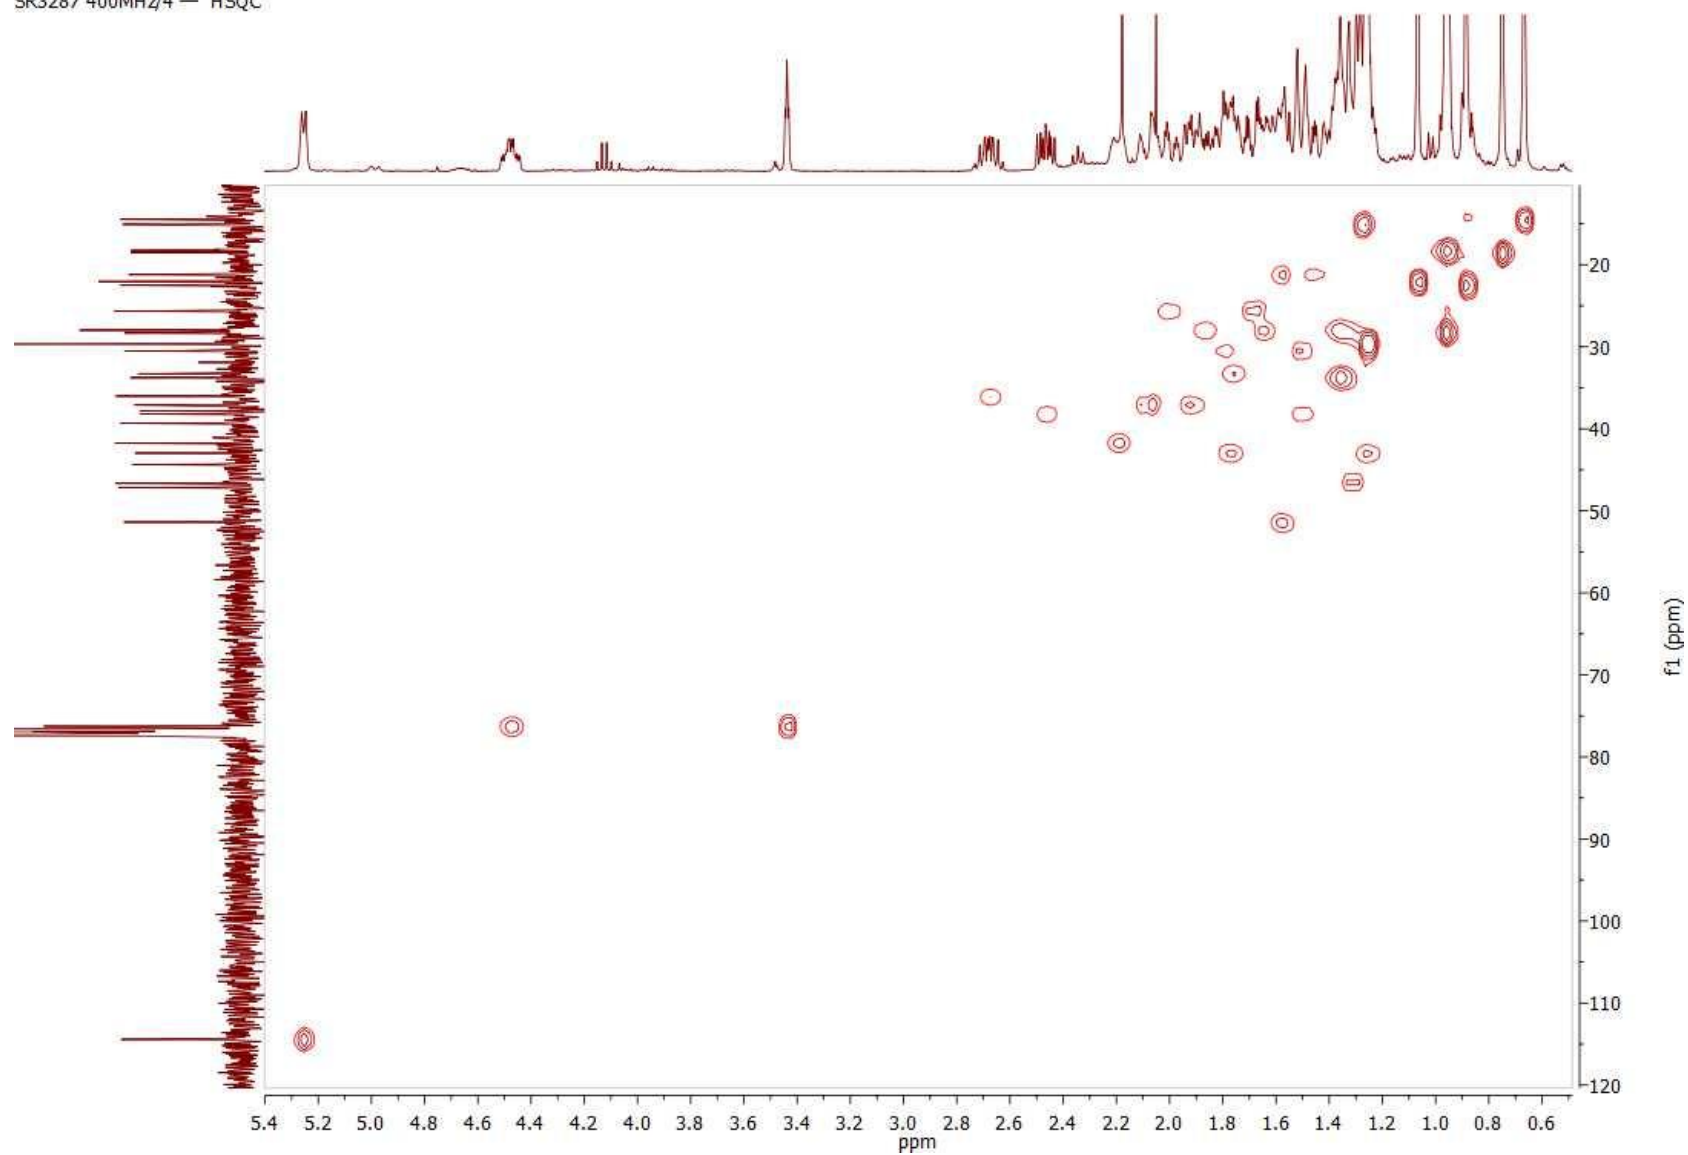

**Figure S7.** HSQC spectrum of **1** recorded in  $\text{CDCl}_3$

SR3287 400MHz/5 — HMBC

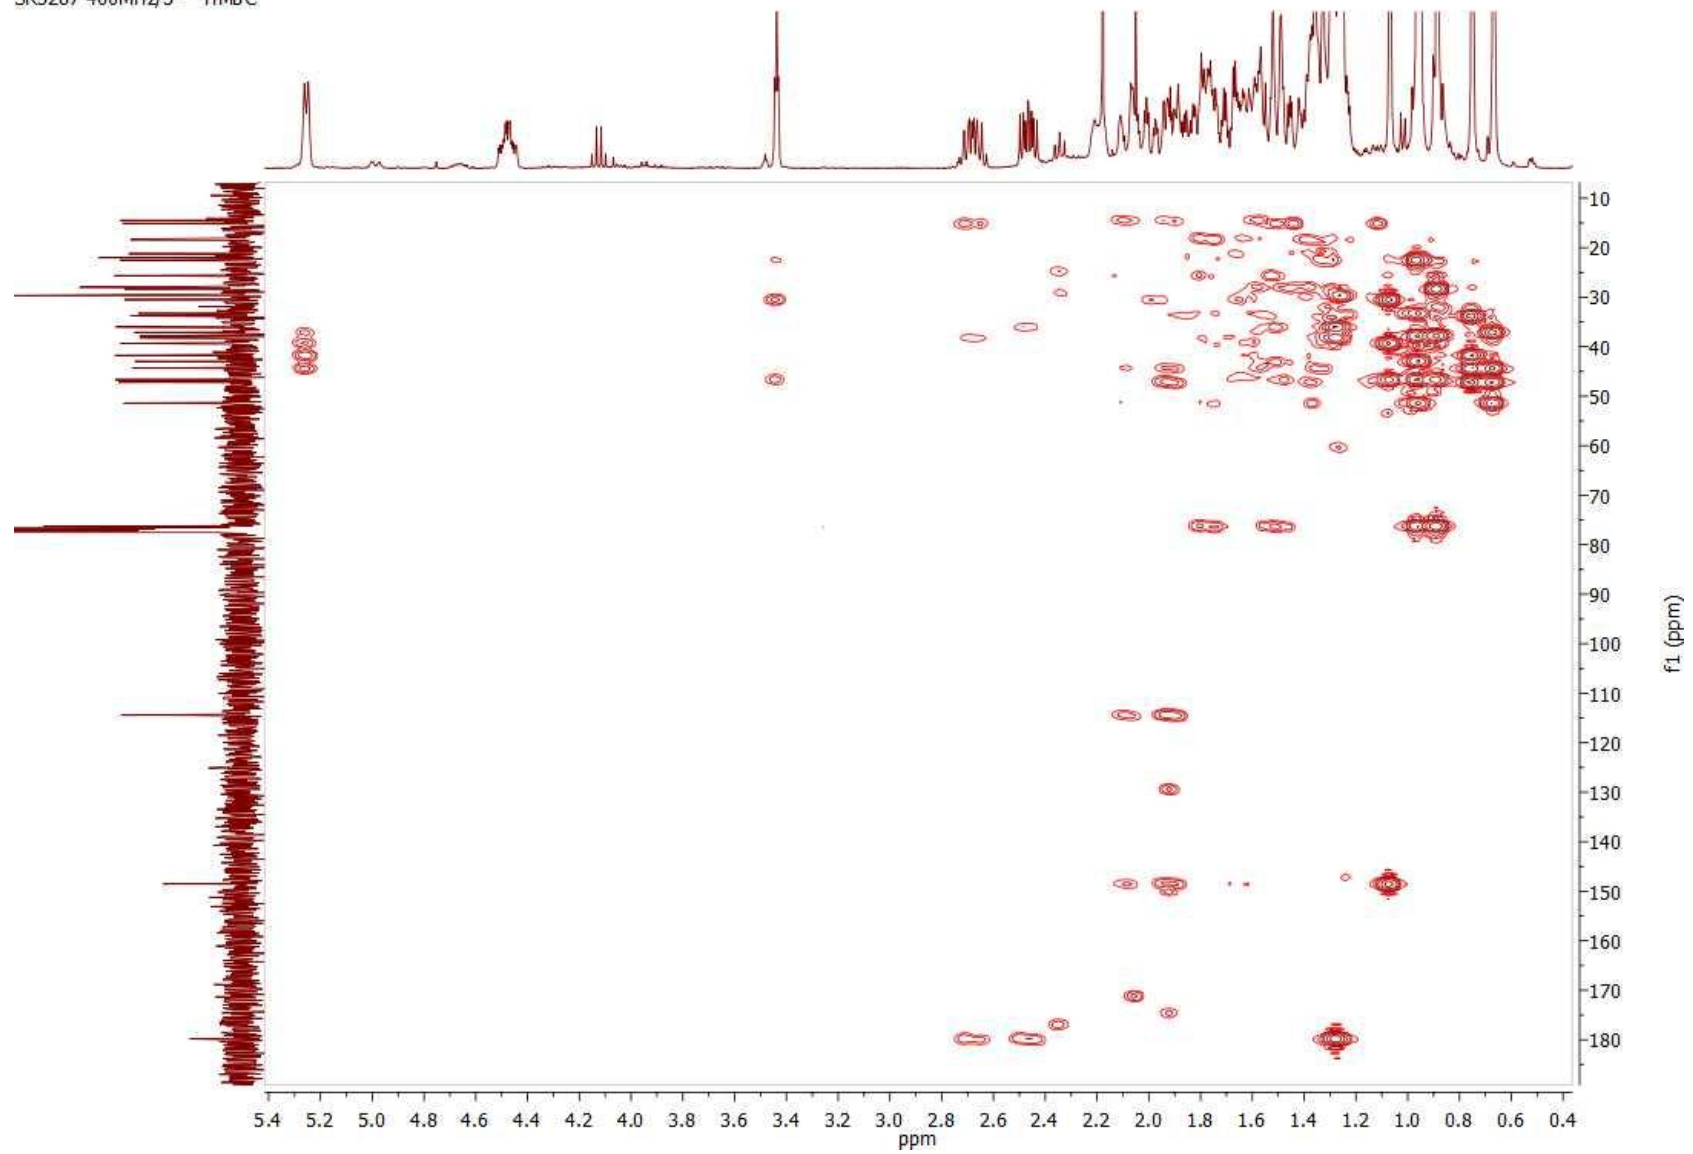

**Figure S8.** HMBC spectrum of **1** recorded in  $\text{CDCl}_3$

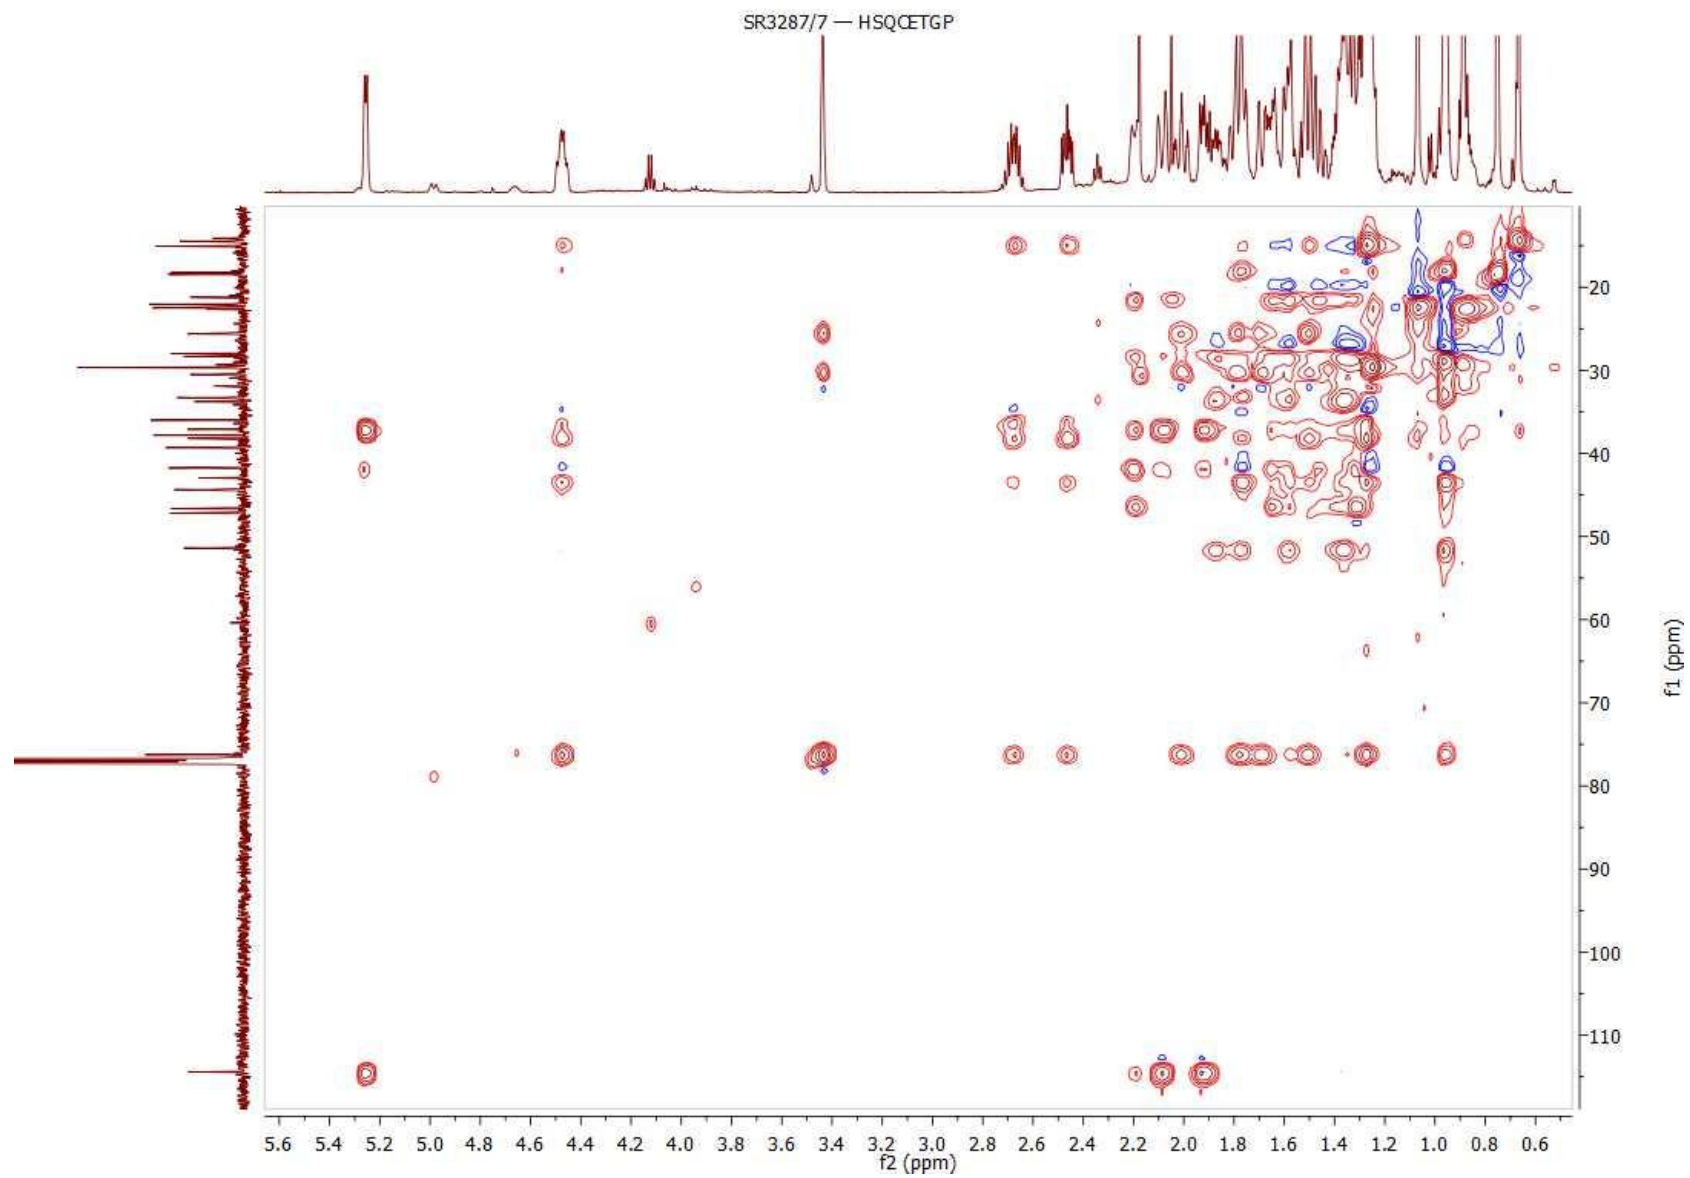

**Figure S9.** HSQC-TOCSY spectrum of **1** recorded in CDCl<sub>3</sub>

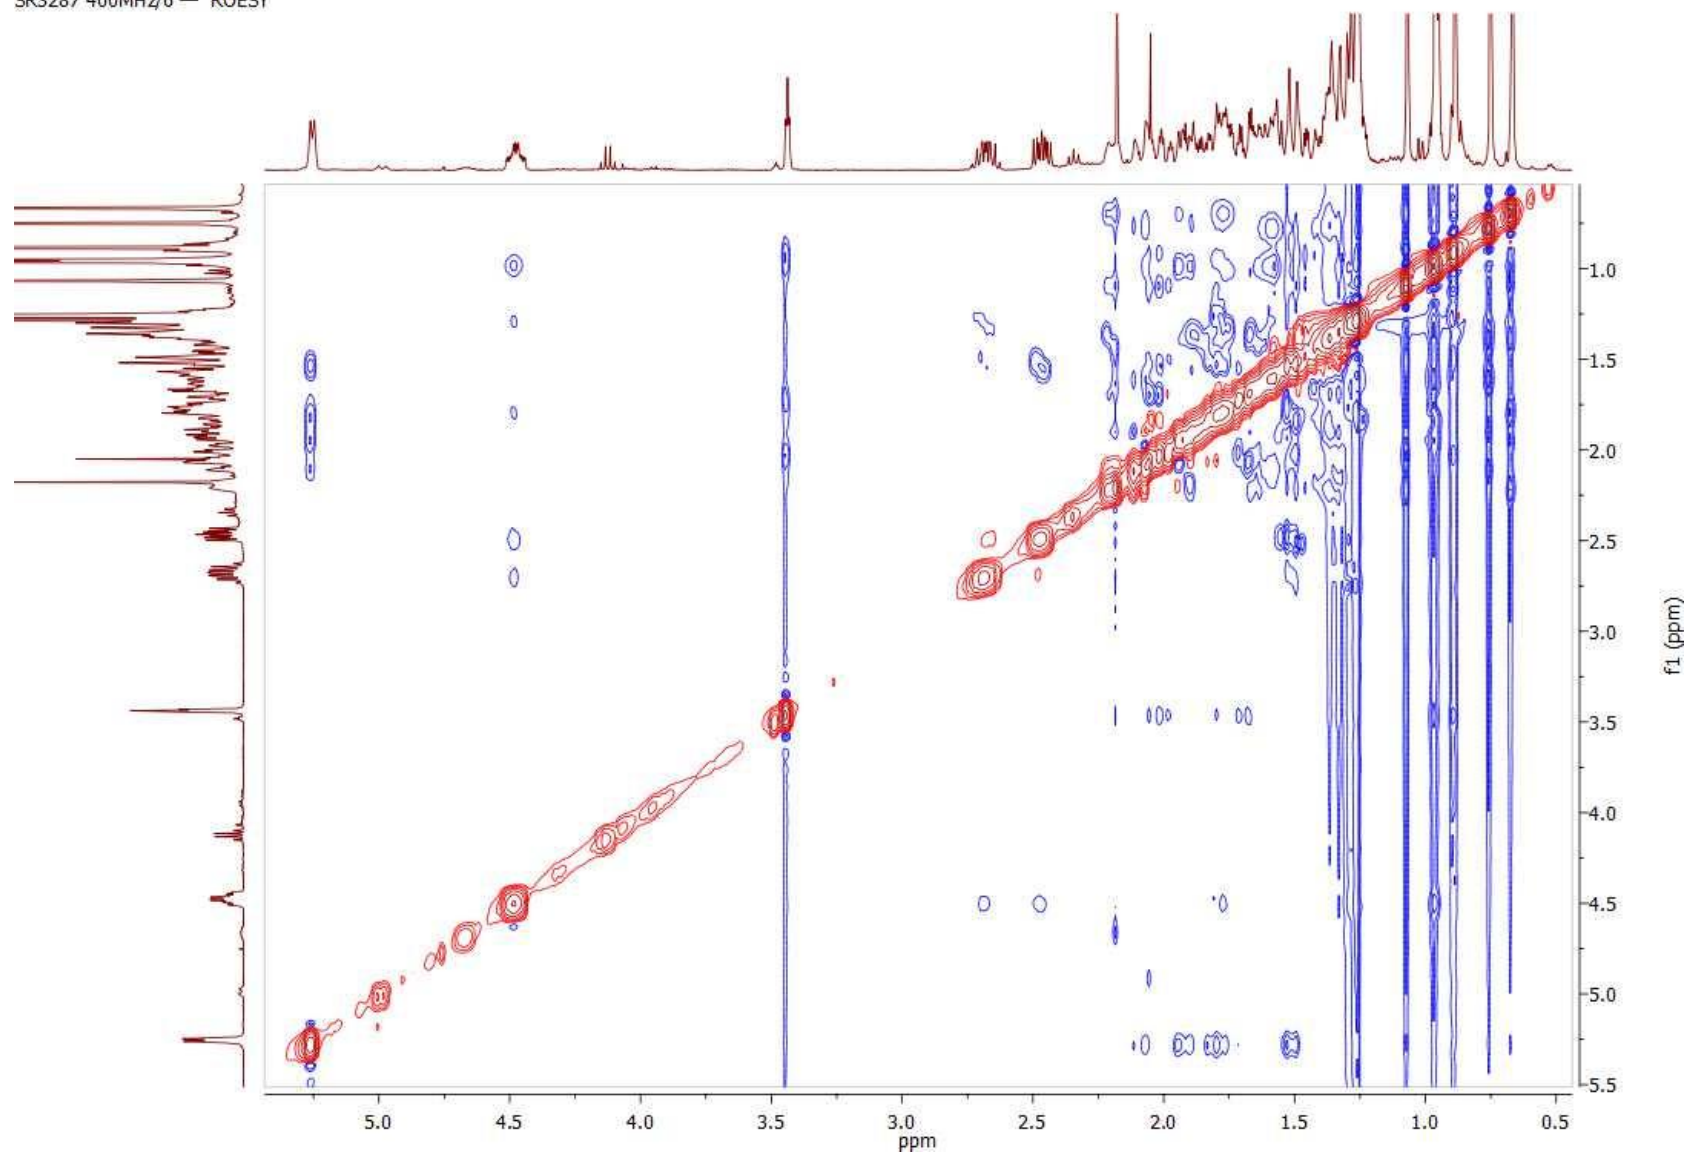

Figure S10. ROESY spectrum of **1** recorded in  $\text{CDCl}_3$
